## Tunable bet hedging in yeast responses to osmotic stress

Yoshikazu Hirate<sup>1†</sup>, Samuel Bottani<sup>2</sup>, Wyming Lee Pang<sup>3‡</sup>, Suzannah Rutherford<sup>1\*</sup>

### Affiliations

<sup>1</sup>Division of Basic Sciences, Fred Hutchinson Cancer Research Center, Seattle, WA.

<sup>2</sup> Laboratoire Matière et Systèmes Complexes, CNRS and Université Paris Diderot- Sorbonne Paris Cité, Paris, France.

<sup>3</sup> Department of Bioengineering, University of California San Diego, San Diego, CA.

\*Correspondence to: [srutherford@fhcrc.org](mailto:srutherford@fhcrc.org).

† Current address Center for Experimental Animals, Tokyo Medical and Dental University, 1-5-45 Yushima, Bunkyo-ku, Tokyo 113-8510, Japan.

‡ Current address UCSD Health Sciences, 9500 Gilman Drive, Department 0012, La Jolla, CA 92093-0012.

## Summary

Microbes limit risk in clonal populations by stochastic bet hedging, the low frequency expression of slow growing cells constitutively resistant to the unpredictable occurrence of environmental stress including antibiotics. Also unpredictable are the severity and duration of stress. Here we describe ‘tunable’ bet hedging in 50 ecologically-distinct strains of budding yeast – continuous variation in frequencies of cells with heritable patterns osmotic stress-responsive signaling, survival and proliferation. Despite extensive variation in early mortality, after adaptation viability was perfectly restored in moderate osmotic stress. In severe stress relative fitness depended on strain-specific proportions of cells with divergent strategies. ‘Cautious’ cells survived extreme stress without dividing; ‘reckless’ cells attempted to divide too soon and failed, killing both mother and daughter. A heritable frequency of cautious and reckless cells produces a rapidly diversifying template for microbial bet hedging that resembles natural variation and is tunable by evolution in different patterns of environmental stress.

# Introduction

In order to understand the evolutionary trajectories of populations and species we need to understand the effects of natural genetic variation on mechanisms of development and expression of phenotypic variation. The mapping between genetic variation and the spectrum of attributes and behaviors upon which selection acts defines population-level properties such as evolvability (the capacity to evolve), robustness or canalization (the capacity to withstand genetic and environmental perturbation), and norms of reaction (optimization, within a given genotype, of phenotypic responses across different environments)(Kirschner and Gerhart, 1998; Rutherford, 2000; West-Eberhard, 2003). Here we describe strain-specific differences in hyperosmotic stress responsive signaling and associated behaviors in a synthetic population of budding yeast.

The high osmolarity glycerol (HOG) signaling pathway is central to an elaborate stress response that reduces cellular damage and death in unpredictably changing osmotic environments where the balance between external solutes and free water pressure in the cell can change suddenly(Hohmann, 2002). A main function of the HOG pathway is the production and accumulation of intracellular glycerol, which restores water balance and, as demonstrated by a large body of work from many labs, is essential for survival, adaptation and proliferation in hyperosmotic stress(Babazadeh et al., 2014; Clotet and Posas, 2007; Hohmann, 2002; Hohmann et al., 2007; Nadal et al., 2002; Saito and Posas, 2012). In the wild, yeast and other microorganisms must balance immediate survival against evolutionary fitness. Multiplicative fitness favors clonal populations that respond as rapidly as possible to improved conditions with earlier cell cycle reentry and proliferation(Ratcliff et al., 2014). On the other hand, individual survival requires that cells carefully sense the amplitude and direction of environmental change to more safely reenter the cell cycle after stress(Clotet and Posas, 2007). The HOG pathway consists of at least two highly-conserved, multi-component osmotic stress sensors linked to a parallel series of at least 15 kinases and accessory proteins that ultimately alter the activity of nearly 10% of the yeast genome(Hohmann, 2002; Saito and Posas, 2012). The sheer numbers of genes involved in HOG signaling, their conservation, and their elaborate circuitry suggest that a nuanced response to osmotic stress has been crucial and strongly selected throughout evolutionary history. As the hyperosmotic stress response of budding yeast has well-characterized and accessible signaling and phenotypic traits that can be measured in the lab and are almost certainly under strong selection in nature(Clotet and Posas, 2007; Hohmann, 2002; Saito and Posas, 2012), this system is ideal for characterizing the mapping between signaling and behavior in a diverse population.

We measured osmotic stress signaling, survival and adaptation in both exponentially growing and nearly quiescent cultures of diploid yeast. Glycerol-3-phosphate dehydrogenase (*GPD1*) is rate-limiting for glycerol production(Remize et al., 2001). We used the synthesis and accumulation of green fluorescent protein (GFP) integrated into the gene for *GPD1* as a proxy for HOG pathway activity. A synthetic population of diverse yeast genotypes was made by

crossing *GPD1::GFP* in the genetic background of a standard laboratory strain (BY4742 *MAT $\alpha$* ) to a panel of wild and industrial genetic backgrounds –e.g. fifty different haploids of the opposite mating type extracted from globally diverse, sequence-validated strains of *Saccharomyces cerevisiae* deposited to the collection of the Royal Netherlands Academy of Arts and Sciences over the past 100 years (CBS; Table 1 and Table S1).

## Results

### Osmotic stress responses of young cultures

The behavior of single cells before and after their exposure to osmotic stress was followed by time-lapse video microscopy of monolayer cultures in custom microfluidics devices (Bennett et al., 2008). When cells in exponential growth were exposed to sudden hyperosmotic stress, cell volume decreased, cell division and budding immediately stopped, and daughter cells retracted (Miermont et al., 2013). After a lag period proportional to the severity of the stress *GFP* fluorescence driven by the *GPD1* promoter began to accumulate in the cytoplasm of surviving cells. Cells that did not accumulate *GPD1::GFP* to high levels did not survive or adapt, developed large vacuoles, and began to die, remaining in view as shrunken cell ghosts. As *GFP* accumulated to saturation levels in the surviving cells, they adapted to the higher osmotic pressure, resumed cell division, budded and began to divide with a longer half time, producing daughter cells with similarly high fluorescence (Miermont et al., 2013).

Viability per culture and *GPD1::GFP* accumulation per cell were measured using flow cytometry of statistically large numbers of cells from all 50 strains (~10,000 cells / sample). The rate and extent of mean *GPD1::GFP* accumulation in exponentially growing cultures exposed to hyperosmotic media depended on the severity of the stress and the genetic background of each strain (Figures 1A and S1). Prior to the osmotic stress mean *GPD1::GFP* fluorescence and viability were uncorrelated. After 2 hours in moderate 0.75 M KCl viability decreased and became steeply correlated with accumulated *GPD1::GFP* (Figures 1B and C). As expected, natural variation in the strength of HOG signaling was directly responsible for variation among the strains in osmotic stress survival.

### Negative feedback drives a robust recovery

The initially strong positive correlation between variation in *GPD1::GFP* accumulation and variation in viability reversed as cells adapted and began to divide (Figure 1C; 4 hours). This distinguished an early phase (0 – 2 hours) of the response when viability decreased markedly and acute HOG signaling promoted osmotic stress survival and a later phase (2 – 4 hours) when viability recovered but became negatively correlated with HOG signaling and *GPD1::GFP* accumulation. The switch from positive to negative correlations might have indicated that stronger HOG signaling, initially beneficial, suddenly caused lower viability. However we think it

more likely that negative feedback increased signaling in the surviving cells of the less viable strains. Negative feedback controls, occurring at many levels and timescales, are present in essentially all of the varied mechanisms that act in concert to increase intracellular glycerol and restore water balance. For example (1) unequal water pressures activate osmotic stress sensors, glycerol channels and other pressure-sensitive components whose activities control and depend on water balance (e.g. see Figure 5 in Hohmann 2002(Hohmann, 2002; Saito and Posas, 2012)), (2) *GPD1* indirectly controls and is controlled by osmotic stress-sensitive kinases that respond to upward and downward changes in water balance(Lee et al., 2012), and (3) nuclear Hog-1 MAP kinase increases the transcription of phosphatases that restore its own cytoplasmic localization and basal activity(Jacoby et al., 1997; Muzzey et al., 2009; Wurgler-Murphy et al., 1997).

Consistent with acting negative regulation there was a strong and highly significant correlation between early mortality (0 – 2 hour decreases in viability) and later accumulations of *GPD1::GFP* (2 – 4 hours; Table 2). We reasoned that cells and strains that adapt quickly experience lower and less sustained effects of osmotic stress (e.g. water loss) with more rapidly attenuated HOG pathway activity and lower *GPD1::GFP* accumulation. Conversely, surviving cells of strains that were slower to adapt and less viable would experience higher and more sustained osmotic (and likely other) stress(es). Prolonged osmotic stress would maintain HOG signaling and *GPD1* transcription – which is also activated by general stress responses(Boy-Marcotte et al., 1998) – further promoting *GPD1::GFP* accumulation (e.g. negative feedback regulation of viability by general stress responses). Indeed, even as *GPD1::GFP* and viability became negatively correlated, their *rates of change* remained positively correlated (Figure 1C, 2 – 4 hours and insets; Table 2), prompting a parsimonious interpretation that osmotic stress signaling promotes adaptation and viability during both the initial and recovery phases of the response.

By 4 hours all strains had adapted to a new steady state in 0.75M KCl and later viability remained largely unchanged (Figure 1C inset, lower right). Interestingly, initial decreases in steady-state viability (0 – 2 hour mortality) were almost perfectly restored by 4 hours (Figure 1D) and, remarkably, by 6 hours early mortality and recovery were over 98% correlated ( $R^2 = 0.9852$ ,  $P < 0.0001$ ; not shown). The biological robustness of adaptation and complete recovery of steady state viability further support the idea that negative feedback restores viability through continued activation of stress responses. Indeed, the continued accumulation of *GPD1* and glycerol – directly responsible for restoration of water balance and reduction of osmotic stress – suggests that intracellular glycerol concentrations integrate the cumulative activities of many facets of the osmotic stress response (e.g. provides a plausible biological mechanism for “integral feedback” that virtually assures perfect adaptation(Muzzey et al., 2009; Yi et al., 2000); manuscript in review). However, despite their resilience, strains that were relatively slower to adapt would be ultimately less fit than rapidly adapting strains due to their higher death rate, slower recovery, and lower viabilities before and after adaptation.

## Extreme stress resistance of older cultures

By contrast with exponential cultures, when the aging yeast cultures (post-diauxic) were exposed to hyperosmotic media they survived and adapted after long periods in unprecedented conditions (Movies 1 and 2). As aging cultures deplete available glucose in their media they undergo a metabolic change called the diauxic shift (Galdieri et al., 2010). During post-diauxic growth stress response proteins accumulate, cell division slows and then stops, and cells enter quiescence (Gray et al., 2004). Remarkably, post-diauxic cultures survived up to 5 weeks in 3 M KCl (41/50 strains). They could not adapt and did not grow in 3 M KCl, but recovered rapidly and grew when plated on fresh isotonic media ('static viability'; Figure 3A and Figure S2). When we tested their limits of adaptation in increasing concentrations of KCl all but one strain could grow on 2.6 M KCl media and three strains could grow on media containing 2.9 M KCl (Table 3). We are unaware of previous reports of such extreme osmotic stress survival or adaption limits for budding yeast of any growth stage or genotype.

## Heterogeneity of cells in older cultures

By contrast with cultures in exponential growth, in post-diauxic growth the genetically identical cells within each strain and culture were surprisingly heterogeneous in their size, shape and signaling behaviors (compare the cell distributions in Figures S1 and S3). Neither total *GPD1::GFP* fluorescence nor rates of change in fluorescence was strongly correlated with viability. After several hours in 2.5 M KCl, *GPD1::GFP* increased sharply in one group of cells as they began to divide. More surprising, another group of cells induced *GPD1::GFP* to high levels, started to divide and then popped, killing both the mother and daughter (Movie 3). Other cells had slower signaling and cell division while the most 'cautious' groups of cells failed to signal or divide but remained in a cellular state of static viability without dividing.

The unique signaling trajectories of most strains were highly reproducible (Figure S3). We used machine learning to assign the different behaviors of the cells in each sample to four Gaussian distributions ( $G_0$ - $G_3$ ) described by eight parameters – means and covariances – numbered according to their increasing levels of fluorescence. Only the mean level of *GPD1::GFP* pre-accumulated into cells of the  $G_3$  distribution of each strain during post-diauxic growth – *prior* to the osmotic challenge and therefore unrelated to osmotic stress signaling – predicted survival at any time. The amount of *GPD1::GFP* in  $G_3$  cells at time 0 predicted early but not later viability and this relationship was better fit by 2<sup>nd</sup> order quadratic rather than linear functions of *GPD1::GFP* (Table 4), showing that early survival was higher in strains with intermediate  $G_3$  accumulations (more variation explained and lower mean square errors). Despite the fine-scaled characterization of osmotic stress signaling behaviors of the different groups of cells in each strain, none of the distributions learned by the Gaussian mixture model, neither pre-accumulated  $G_3$ , total *GPD1::GFP* fluorescence, nor stress-induced *GPD1::GFP* in any distribution, embodied features of osmotic stress signaling important for later survival.

## Continuous variation in stress responses

In order to map osmotic stress-responsive signaling onto survival more directly, we clustered the osmotic stress signaling trajectories of each strain using state vectors to describe directly *GPD1::GFP* distributions of cells in each culture unbiased by Gaussian assumptions or approximations. Based on their shared and strain-specific (heritable) signaling behaviors, the 50 strains rapidly converged onto two large groups made up of six mean clusters (Figure 2). Each strain was further ordered within and between mean clusters based on their clustering statistics (Table 4), with their rank order describing increasingly rapid accumulations of *GPD1::GFP* and ‘reckless’ signaling (Figure S4). Tellingly, both mean cluster and rank predicted viability over time (Figure 3A and Table 4), thereby confirming the biological relevance of ‘cautious’ versus ‘reckless’ osmotic stress signaling, validating our clustering method and supporting the role of natural osmotic stress signaling differences between strains in shaping variation in fitness during osmotic stress.

## Evidence for bet hedging

As cautious and reckless behaviors were found both within and between strains, we wondered whether bet hedging, the expression of alternate, conditionally-adaptive phenotypes within a clone of genetically identical organisms (King and Masel, 2007; Meyers and Bull, 2002; Philippi and Seger, 1989; Ratcliff et al., 2014; Simons, 2011), could explain the observed variation in osmotic stress signaling and survival. By contrast with previously described stochastic bet hedging, where pre-adapted stress-resistant cells occur at low frequency in clonal populations (De Jong et al., 2011; Levy et al., 2012), ranked signaling responses were heritable, stress-specific and uncorrelated with the pre-adapted ( $G_3$ ) resistance acquired in post-diauxic growth. Strain viabilities varied depending on their rank and the severity of the osmotic environment. Milder conditions favored higher-ranked strains with more aggressive osmotic stress signaling strategies, but with increasing time and harsher conditions more cautious strains and behaviors became more fit (Table 4). For example, W178 at rank 50 was most viable in moderate 0.75 M KCl, but the optimum shifted to rank 25 after 20 hours in 2.5 M KCl, 20 after 72 hours, and 9.6 after 168 hours (1 week). After 168 hours, viability had decreased most among the most reckless, highest-ranked strains (S5). To confirm that the increasing survival of cautious strains was correlated with their experience of osmotic stress and not simply time in culture, we again incubated cultures in 2.5 M KCl for 168 hours, but they were first exposed to a mild pre-stress (2 hours in 0.5 M KCl) to pre-induce osmotic stress proteins. If optimum rank depended solely on time independent of the degree of stress experienced by the different strains, then it should be unaffected by the short pre-stress. However, as predicted optimum rank shifted toward more reckless behaviors (rank 9.6 to rank 18;  $P < 0.0001$ ) in response to the pre-stress and viability increased by ~10%. This suggests pre-treated cells experienced lower osmotic stress implying that the degree of stress directly determines the



optimum rank. The strong correlation between relative fitness and signaling behavior with increasing osmotic stress is strong empirical evidence for bet hedging (Simons, 2011).

After 168 hours in 2.5 M KCl, the most reckless cells in the highest-ranking strains began to selectively die and disappear. For example, the replicate cultures of strain W242 (rank 49) with lower viability had fewer cells with high accumulations of *GPD1::GFP*, smaller  $G_3$  distributions, and correspondingly larger distributions of cells with lower mean *GPD1::GFP* (Figure 3B). The selective loss of cells with the highest accumulations of *GPD1::GFP* could indicate that *GPD1::GFP* levels simply decrease over time. However,  $G_3$  distributions were stable over most time points and in most strains (Figure 2). We think it more likely that after 168 hours the most aggressive cells attempt to divide and pop, preferentially decreasing  $G_3$  relative to the other distributions (e.g. Movie 3). Rapid signaling, adaptation and recovery of cell division, a fitness advantage in mild conditions, become a liability in severe or prolonged osmotic stress. On the other hand static viability would dramatically reduce evolutionary fitness in normal environments, but could allow more cautious cells and strains to survive severe stress.

## Evolution of bet hedging

As cautious and reckless strains reliably express a range of cells with different behaviors and fitness depending on the environment, we wondered whether a simple, 2-state bet hedging model including heritable proportions of cautious and reckless cell types could account for the observed variation in osmotic stress signaling and explain the complex relationship between rank and viability. Assuming aggressive osmotic stress signaling with rapid recovery and resumption of growth is the default, ancestral behavior, we hypothesized a heritable probability of cautious signaling and behavior arose in response to the unpredictable severity and duration of potentially lethal osmotic environments. To test this idea, we modeled the relative fitness of strains with different signaling strategies after several generations of growth, including abrupt changes between three osmotic stress environments that discriminate cautious versus reckless behavior: (E0) a permissive environment in which both cautious and reckless cells grow equally well, (E1) a restrictive environment approximating moderate osmotic stress where reckless cells divide and cautious cells survive without dividing, and (E2) a killing osmotic stress where reckless cells die and cautious cells survive without cell division.

We modeled the heritable probability ( $P$ ) of daughters with cautious signaling and behavior and asked whether it could evolve ( $0 \leq P \leq 1$ ). Our model calculates the relative fitness (cell numbers) of different strategies  $\{0, 0.1, 0.2, \dots, 0.9, 1.0\}$  after several generations under each of the 9 possible environmental shifts between three environments (Figure 3C). Most environmental shifts favor an optimum strategy of either all cautious ( $P = 1$ ) or all reckless cell types ( $P = 0$ ). Strictly intermediate strategies ( $0 < P < 1$ ) and bet hedging prevail only when the osmotic environment shifts from moderate to more severe (E1  $\rightarrow$  E2), with the optimum  $P$  depending on the number of generations in the first environment. Shorter lag periods – corresponding to less severe osmotic conditions – and more cell divisions in E1 initially favor



lower  $P$  and a higher proportion of reckless cells. Longer lag periods – corresponding to more severe conditions and fewer cell divisions – favor higher  $P$  and a higher proportion of cautious cells. Worsening environments are common in nature (for example, during fermentation or drying). Indeed, as predicted by the model, lower-ranked strains with more cautious signaling behaviors, longer lag periods and fewer attempted cell divisions were increasingly fit over time and with an increasing severity of osmotic stress. Bet hedging in microorganisms was previously thought to arise almost exclusively through stochastic switching independent of unpredictable environmental shifts (De Jong et al., 2011; Levy et al., 2012; Ratcliff and Denison, 2010; Ratcliff et al., 2014). While simple, our model of heritable bet hedging generalizes to any stress response, providing conceptual framework for understanding how a heritable frequency of cautious cells can be tuned by evolution in different patterns of environmental stress.

## Discussion

Classical evolutionary models assign fitness directly to genotypes, mutations, and mean trait values without consideration of the genotype-to-phenotype map. On the other hand, molecular models provide detailed mechanisms of development but rarely consider the effects of natural genetic variation. Labyrinthine developmental mechanisms – themselves controlled by genetic variation – translate genotypes into phenotypes with a variable fidelity that allows for the possibility of phenotypic heterogeneity and the evolution of bi-stable states (Rutherford, 2003). Here we view well-characterized osmotic stress signaling responses on a backdrop of natural variation. This enabled our identification of negative feedback controlling a robust recovery of steady-state viability in exponential growth. However microorganisms in nature spend a large fraction of their time in post-diauxic or quiescent phases and may encounter severe and unpredictable stresses (Gray et al., 2004). In post-diauxic growth, heritable variation in the distribution of cautious to reckless signaling is a risk-spreading strategy. In yeast as in multicellular organisms fitness depends on rapid recovery and reproduction in capricious and potentially lethal environments whose severity and duration are also unpredictable (Ratcliff and Denison, 2010; Ratcliff et al., 2014). Our simple model of programmable bet hedging shows how yeast can evolve to balance constraints between osmotic stress survival and evolutionary fitness in different patterns of environmental stress.

## Experimental procedures

### Strain acquisition and deposition

Over 200 unique wild and industrial diploid strains of *Saccharomyces cerevisiae* were obtained from the fungal diversity collection of Centraalbureau voor Schimmelcultures (CBS), an institute of the Royal Netherlands Academy of Arts and Sciences in Utrecht, Netherlands (<http://www.cbs.knaw.nl/index.php/collection/>). Strains modified for this report are listed in Tables 1 and S1. They have been deposited to the Yeast Genetic Resources Lab of the National BioResource Project in Osaka, Japan ([http://yeast.lab.nig.ac.jp/nig/index\\_en.html/](http://yeast.lab.nig.ac.jp/nig/index_en.html/)).

### Haploid *MATa* library of wild and industrial genotypes

The first step in our library construction pipeline was to delete the *HO* locus of each strain by replacement with the KanMX4 marker gene and “barcodes” to permanently label each strain while preventing homothalism (Table S1)<sup>30,31</sup>. The KanMX4 gene was PCR-amplified for this purpose with primers containing the barcode sequences<sup>32</sup>. Next, kanamycin-resistant transformants were grown in pre-sporulation medium containing 10% glucose followed by sporulation under starvation conditions in 1% potassium acetate. Although the strains differ in their sporulation efficiency and optimal conditions (<http://www.cbs.knaw.nl/Collections/>), we found it was most efficient to put strains through repeated rounds of a general sporulation protocol rather than trying to optimize the conditions for each strain. The *MATa* haploids were identified by “schmoo” formation in 96-well plates containing alpha factor and confirmed by crossing to a G418-sensitive, clonNAT-resistant *MATalpha* tester strain and selection on double-antibiotic plates. Next we deleted the *URA3* gene using a standard gene deletion method and selected the *ura3Δ* clones by replica plating and selection on 5-FOA. Finally, *ho* and *ura3* deletions and the barcode sequences of each strain were verified by PCR and sequencing. Forty-nine wild strains and a laboratory strain meeting these criteria were used in this study (see Tables 1 and S1 for strain details).

### Synthetic population of *GPD1::GFP* wild/lab diploids

The *MATalpha* laboratory strain BY4742 was transformed to create a stably integrated *GPD1::GFP* reporter (G01) using a deletion cassette containing a *URA3* marker for selection on SC-URA plates<sup>32,33</sup>. A synthetic “population” of diploids was created by mating each strain in the library of *MATa* haploids (50 strains) with *MATalpha* G01 by mixing on SC-URA plates for 2 hours followed by streaking onto selective SC-URA+G418 plates. The 50 resulting wild/lab diploid strains all have 50% of their genes and the *GPD1::GFP* reporter from strain G01 in the BY4742 laboratory strain background (Table 1). After mating, it was necessary to screen for triploids or tetraploids, which express higher levels of *GPD1::GFP* and have higher tolerance to osmotic stress. Overnight cultures of wild/lab yeast were diluted 50-fold into fresh YPD+G418 and grown for an additional 4 hours, fixed by 1:3 dilution into cold ethanol and re-suspended in

20 ug/ml RNase A to digest ribonucleic acids. Digested cells were stained with 30 ug/ml propidium iodide to label DNA and ploidy was determined by flow cytometry (FACS Calibur; Becton Dickinson).

### **Exponential and post-diauxic cultures**

Fresh cultures were generated for each experiment by replicating frozen 96-well plates onto YPD+G418 agar followed by 4 days growth at 21° C. To obtain mid-exponential cultures, freshly patched cells were grown in 2 ml liquid YPD+G418 cultures at with rotation (72 rpm) at 21° C. for 2 days. Two microliters of these suspensions were diluted into 2 ml of liquid YPD+G418 and grown at 21° C. for 14 hours (e.g. 5 rounds of cell division on average, with strain ODs ranging from 0.80 – 1.44). For post-diauxic cultures, freshly patched cells were grown in 2 ml liquid YPD+G418 cultures at with rotation (72 rpm) at 21° C. for 4 days. Strains cultured up to 8-days post-diauxic growth were tested for osmotic stress resistance and we found that 4 day cultures were already maximally resistant (not shown).

### **Survival plating assays**

To determine the adaptation limit of each strain, post-diauxic cultures were diluted to OD<sub>600</sub> of 0.1 with exhausted YPD (to prevent re-growth), sonicated for 5 seconds at a low setting (2.5; Sonifier Cell Disrupter, Model W185) and plated (5 ul) on 96-well YPD plates containing KCl ranging from 2.0 to 3.0 M. Growth was examined for up to 2 months at 21° C. Viability and static survival under osmotic stress (Figures 2B and S2) was determined after incubation in 96-well microtiter plates containing liquid media with increasing concentrations of KCl for the times indicated, followed by plating on iso-osmolar YPD agar plates.

### **Microfluidics**

We used custom made microfluidics devices with two fluid inputs as described<sup>12</sup>. When performing microfluidics with post-diauxic cells, post-diauxic cultures were inoculated into devices with exhausted YPD medium and allowed to stabilize for a few hours prior to osmotic stress. Experiments were run at ambient room temperature and observed using a Nikon TS100 inverted microscope. Recordings were made using a Photometrics CoolSnap HQ2 digital camera operated by Metavue (Molecular Dynamics). Analysis of acquired images was performed using Image J software (<https://imagej.nih.gov/ij/>).

### **Flow cytometry**

For flow cytometry, after osmotic stress treatments 4 ml of PBS was added to each culture. Cells were isolated by centrifugation and resuspended in 1 ml PBS, transferred to FACS tubes, sonicated (5 seconds at level 3, Sonifier Cell Disrupter, Model W185) and stained with 3 ug/ml propidium iodide (PI) to monitor viability. After 20 min GFP fluorescence and viability were quantified using a FACS Calibur flow cytometer (Becton Dickinson) that had been calibrated

prior to each use with SPHERO Rainbow Fluorescent Particles, 3.0 – 3.4  $\mu\text{m}$  (BD Biosciences). Flow cytometry data were gated using magnetic windows in FlowJo software to eliminate cell fragments, clumped and dead (PI-positive) cells (<http://www.flowjo.com/>).

For analysis, raw data for the viable cells in each sample (forward scatter, side scatter and GFP fluorescence data; up to 10,000 cells/sample) were extracted into an SQL database. Cell data were scaled for linearity (e.g.  $\text{FLH1}^{1/3}$ ,  $\text{FSC}^{1/3}$ ,  $\text{SSC}^{1/2}$  for GFP fluorescence, forward scatter, and side scatter, respectively). Distributions of *GPD1::GFP* accumulation in exponential cultures were unimodal, and therefore well-defined using a single mean (e.g. Figure S1). By contrast, *GPD1::GFP* accumulations of cells in post-diauxic cultures were clearly multimodal at many time points (Figure S3). To identify different distributions of cells we used machine learning was performed using the `sklearn.mixture` option in the Gaussian Mixture Model (GMM) algorithm of the Python `scikit` package (<http://scikit-learn.org/>). The GMM algorithm identified parameters of the four most-likely Gaussian (defined by means and covariances) given the data for each sample. The 2-dimensional fits of *GPD1::GFP* and forward scatter data distinguished different cell types slightly better than fitting *GPD1::GFP* only; adding side scatter to fit distributions in 3-dimensional space little additional resolution. The number of Gaussians to be fit is a parameter that must be provided to the model. We used Bayesian information criteria (BIC) to determine that the data were well described by four distributions. In samples containing obviously fewer than four distributions, the under-populated distributions were assigned a correspondingly low frequency of cells (see Figures S1 and S3).

## Clustering

To group, and ultimately rank, the strains according to their osmotic stress signaling responses to 2.5 M KCl during post-diauxic growth we used hierarchical clustering with Wards method in the `fastcluster` Python implementation (<http://www.jstatsoft.org/v53/i09/>)<sup>34</sup>. First we created state vectors of each strains behavior. Cell distributions were binned onto a 100 X 100 2-D grid according to their *GPD1::GFP* and forward scatter data, smoothed with Python `scipy.ndimage.filters.gaussian_filter` and normalized to define a linear 10,000 element state vector for each sample (strain, time point). While 100 bins on each axis were sufficient to capture detailed distributions while allowing efficient computation, we found stronger clustering when performing the same analysis using the combined *GPD1::GFP* and forward scattering data. The osmotic stress response up to 168 hours was defined by the vectors for each of the 7 time points, successively appended to form a 70,000 element time-line vector representing the combined evolution of *GPD1::GFP* accumulation and forward scatter data.

The time-line vectors were used to compute a distance matrix between strains using the symmetric Kullback-Leibler divergence. As each strains and time point was replicated between 4 and 15 times, we controlled for variation in sampling and clustering outcomes by randomly drawing samples for each strain and time point with equal probability. Clustering was repeated for a total of 17,000 permutations requiring 43 hours of computation time on a 3.7 GHz Intel

7 iMac. This was sufficient to achieve stable Monte-Carlo statistics. Computational sorting of time-series distributions resolved 6 clades differentiated for rates of GFP accumulation, adaptation and survival. The fraction of permutations in which each strain grouped with more than half of the other strains in its mean cluster was used to rank that strain's behavior relative to the other strains in its group (clustering statistics; Table S2).

## Author contributions

YH designed and performed experiments, data analysis, figures and writing for initial versions of this manuscript. SB performed modeling, database construction, data analysis, statistical design, computer programming, writing and editorial support. WLP designed microfluidics devices and training. SR was involved in conceptual design, supervision and workflow for wild strain collection, data analysis, model development, figures and writing.

## Acknowledgments

We thank Lisa Castenada, Tanya Gottlieb, Adrienne Hughes, Brandon (Tommy) Huynh, Katie Michaelson, Rachel Rodman, and numerous undergraduate helpers for construction and validation of the wild strain collection, Jeff Hasty for advise on microfluidics and Stéphane Douady and Pierre-Yves Bourguignon for discussions and advice on scaling and clustering. This research was supported by a Scholar Award from the Damon Runyon Cancer Research Foundation (SR) and the Lady Tata Memorial Trust (YH).

## References

- Babazadeh, R., Furukawa, T., Hohmann, S., and Furukawa, K. (2014). Rewiring yeast osmostress signalling through the MAPK network reveals essential and non-essential roles of Hog1 in osmoadaptation. *Sci. Rep.* 4, 4697.
- Bennett, M.R., Pang, W.L., Ostroff, N.A., Baumgartner, B.L., Nayak, S., Tsimring, L.S., and Hasty, J. (2008). Metabolic gene regulation in a dynamically changing environment. *Nature* 454, 1119–1122.
- Boy-Marcotte, E., Perrot, M., Bussereau, F., Boucherie, H., and Jacquet, M. (1998). Msn2p and Msn4p control a large number of genes induced at the diauxic transition which are repressed by cyclic AMP in *Saccharomyces cerevisiae*. *J. Bacteriol.* 180, 1044–1052.
- Clotet, J., and Posas, F. (2007). Control of Cell Cycle in Response to Osmostress: Lessons from Yeast (Elsevier Masson SAS).
- Galdieri, L., Mehrotra, S., Yu, S., and Vancura, A. (2010). Transcriptional Regulation in Yeast during Diauxic Shift and Stationary Phase. *Omi. A J. Integr. Biol.* 14, 629–638.
- Gray, J. V, Petsko, G. a, Johnston, G.C., Ringe, D., Singer, R. a, and Werner-Washburne, M. (2004). “Sleeping beauty”: quiescence in *Saccharomyces cerevisiae*. *Microbiol. Mol. Biol. Rev.* 68, 187–206.
- Hohmann, S. (2002). Osmotic Stress Signaling and Osmoadaptation in Yeasts. *Microbiol. Mol. Biol. Rev.* 66, 300–372.
- Hohmann, S., Krantz, M., and Nordlander, B. (2007). Yeast Osmoregulation (Elsevier Masson SAS).
- Jacoby, T., Flanagan, H., Faykin, A., Seto, A.G., Mattison, C., and Ota, I. (1997). Two Protein-

- tyrosine Phosphatases Inactivate the Osmotic Stress Response Pathway in Yeast by Targeting the Mitogen-activated Protein Kinase, Hog1. *J. Biol. Chem.* 272, 17749–17755.
- De Jong, I.G., Haccou, P., and Kuipers, O.P. (2011). Bet hedging or not? A guide to proper classification of microbial survival strategies. *BioEssays* 33, 215–223.
- King, O.D., and Masel, J. (2007). The evolution of bet-hedging adaptations to rare scenarios. *Theor. Popul. Biol.* 72, 560–575.
- Kirschner, M., and Gerhart, J. (1998). Evolvability. *Proc. Natl. Acad. Sci. U. S. A.* 95, 8420–8427.
- Lee, Y.J., Jeschke, G.R., Roelants, F.M., Thorner, J., and Turk, B.E. (2012). Reciprocal Phosphorylation of Yeast Glycerol-3-Phosphate Dehydrogenases in Adaptation to Distinct Types of Stress. *Mol. Cell. Biol.* 32, 4705–4717.
- Levy, S.F., Ziv, N., and Siegal, M.L. (2012). Bet hedging in yeast by heterogeneous, age-correlated expression of a stress protectant. *PLoS Biol.* 10.
- Meyers, L.A., and Bull, J.J. (2002). Fighting change with change: Adaptive variation in an uncertain world. *Trends Ecol. Evol.* 17, 551–557.
- Miermont, A., Waharte, F., Hu, S., McClean, M.N., Bottani, S., Léon, S., and Hersen, P. (2013). Severe osmotic compression triggers a slowdown of intracellular signaling, which can be explained by molecular crowding. *Proc. Natl. Acad. Sci. U. S. A.* 110, 5725–5730.
- Muzzey, D., Gómez-Urbe, C. a., Mettetal, J.T., and van Oudenaarden, A. (2009). A Systems-Level Analysis of Perfect Adaptation in Yeast Osmoregulation. *Cell* 138, 160–171.
- Nadal, E. de, Alepuz, P., and Posas, F. (2002). Dealing with osmostress through MAP kinase activation. *EMBO Rep.* 3, 735–740.
- Philippi, T., and Seger, J. (1989). Hedging one's evolutionary bets, revisited. *Trends Ecol. Evol.* (Personal Ed. 4, 41–44.
- Ratcliff, W.C., and Denison, R.F. (2010). Individual-Level Bet Hedging in the Bacterium *Sinorhizobium meliloti*. *Curr. Biol.* 20, 1740–1744.
- Ratcliff, W.C., Hawthorne, P., and Libby, E. (2014). Courting disaster: How diversification rate affects fitness under risk. *Evolution* 1–10.
- Remize, F., Barnavon, L., and Dequin, S. (2001). Glycerol export and glycerol-3-phosphate dehydrogenase, but not glycerol phosphatase, are rate limiting for glycerol production in *Saccharomyces cerevisiae*. *Metab. Eng.* 3, 301–312.
- Rutherford, S.L. (2000). From genotype to phenotype: buffering mechanisms and the storage of genetic information. *Bioessays* 22, 1095–1105.
- Rutherford, S.L. (2003). Between genotype and phenotype: protein chaperones and evolvability. *Nat. Rev. Genet.* 4, 263–274.
- Saito, H., and Posas, F. (2012). Response to hyperosmotic stress. *Genetics* 192, 289–318.
- Simons, A.M. (2011). Modes of response to environmental change and the elusive empirical evidence for bet hedging. *Proc. Biol. Sci.* 278, 1601–1609.
- West-Eberhard, M.J. (2003). Developmental plasticity and evolution.
- Wurgler-Murphy, S.M., Maeda, T., Witten, E. a, and Saito, H. (1997). Regulation of the *Saccharomyces cerevisiae* HOG1 mitogen-activated protein kinase by the PTP2 and PTP3 protein tyrosine phosphatases. *Mol. Cell. Biol.* 17, 1289–1297.
- Yi, T.M., Huang, Y., Simon, M.I., and Doyle, J. (2000). Robust perfect adaptation in bacterial chemotaxis through integral feedback control. *Proc. Natl. Acad. Sci. U. S. A.* 97, 4649–4653.



## Figure legends

### Figure 1. Rate of change in osmotic stress signaling with negative feedback predicts survival and robust recovery of exponential cultures in moderate osmotic stress.

- A. Time course of mean accumulated *GPD1::GFP* fluorescence (AU) in exponential cultures exposed to 0.75 and 1.5 M KCl. Each point represents an independent replicate measurement; curves connect strain means at each time (with a minimum of 3 replicates for each point). In the absence of stress, all strains had high steady-state viability (propidium iodide dye exclusion; range 96.3 – 98.7%; mean 97.6%) and relatively low mean GFP fluorescence indicating low background activity of HOG pathway signaling through the *GPD1* promoter and low *GPD1::GFP* accumulation (range 12.7 – 34.8 AU; mean 18.8 AU).
- B. Pie charts showing relative changes in mean viability (shaded area), mortality (white area) and *GPD1::GFP* accumulation (opacity level) after 2 hours in 0.75M KCl with strains ordered by increasing viability at 2 hours. The 2 hour viability was proportional to the 2 hour viability of non-disrupted controls with two intact copies of the *GPD1* gene ( $R^2 = 0.7085$ ;  $P < 0.0001$ ; not shown).
- C. Relationship between mean *GPD1::GFP* accumulation (AU) and viability in mid-exponential cultures exposed to 0.75 M KCl for 0, 2, 4, and 6 hours (h). Each data point represents the average of at least three replicates per strain (~10,000 cells/ sample). The ellipses indicate correlations between viability and fluorescence at  $\alpha = 0.95$ . The inserts show relationships between changes in *GPD1::GFP* and viability over each time interval.
- D. Negative feedback drives a robust recovery of steady-state viability after 4 hours in 0.75 M KCl. By linear regression recovery = (0.7670) early mortality + 3.4936 ( $R^2 = 0.9351$ ;  $P < 0.0001$ ). Integral feedback control would assure perfect adaptation of stress responses, water balance and steady state viability (in preparation). Due to persistence in cultures of dead cells over the course of the experiment, 100% recovery of steady-state viability is not possible. The data fit a model whereby surviving cells undergo ~3 cell divisions in all strains.

### Figure 2. Continuous variation in signaling behaviors and survival of postdiauxic cultures exposed to severe osmotic stress.

- A. Strains classified by mean cluster (MC0 – MC5) and ranked top (1) to bottom (50) according to changes in *GPD1::GFP* accumulation (AU) over time (see Table S2 and methods). Each time point shows representative distributions of *GPD1::GFP* accumulation (green) and relative survival red (99.7% viability) to blue (11.7% viability). Cells above the 89<sup>th</sup> percentile (top 11%) are shown in black. Prior to osmotic challenge



steady-state viabilities were uniformly high (range 93.0 – 99.6%; mean 98.2%). Rank-ordered mean clusters are topographically equivalent to a sequential ordering.

- B. Relative viability of post-diauxic cultures (WXXX.BY01 controls) incubated in 3 M KCl before plating on iso-osmolar media. Cultures were re-ordered according to the ranked signaling behavior given in Figure 2A. Strains are color-coded as in Figure 1C for comparison of exponential and post-diauxic cultures. The same experiment as originally plated is shown in Figure S1.

**Fig. 3. Cautious and reckless behaviors in a simple bet hedging model produces observed variation in survival.**

- A. The most cautious behavior (static viability) of post-diauxic cells from strain W027 exposed to 3 M in microfluidic chambers. Individual cell behaviors mirror population behaviors measured by flow cytometry – e.g longer lag periods and increased accumulations of *GPD1::GFP* with increasing osmotic stress. Colored traces indicate accumulated fluorescence ( $\text{AU} \times 10^{-2}$ ) in representative cells at 1.5 (green), 2.0 (blue), 2.5 (red) and 3.0 M KCl (yellow). Arrows indicate average time to the first cell division  $\pm$  standard deviations.
- B. Mean cluster predicts viability in different osmotic environments. Average viabilities among mean clusters for post-diauxic cultures in 2.5 M KCl for indicated times. Horizontal lines show overall average viability (all 50 strains). The numbers of strains in each mean cluster are 2 (MC0), 15 (MC1), 12 (MC2), 12 (MC3), 3 (MC4), 6 (MC5; see Figure 2). Asterisks indicate significance at the  $\leq 0.05$  level by ANOVA or, where appropriate, Welch's ANOVA (JMP statistical software, SAS Institute, Cary, NC).
- C. Rank predicts viability in different osmotic environments. Shown are the best-fit curves for viability by rank in each of the environments listed (2<sup>nd</sup> order quadratic relationships; Table 4). The optimal signaling strategy (rank) shifted from higher (50; most reckless) to lower (most cautious) as the environment became progressively more severe. Dashed lines indicate the relationship between rank and viability was only marginally significant in that environment.
- D. Cells with the most aggressive signaling began to die after long periods in severe stress leaving increasing fraction of cells with lower *GPD1::GFP* accumulations. Shown are distributions of accumulated *GPD1::GFP* fluorescence (AU) and viability in replicate cultures of W242 (rank 49) in 5 replicate cultures after 168 hours in 2.5 M KCl. Mean ( $\bar{x}$ ), standard deviation (std), and weight ( $w$ ; the fraction of cells in each distribution) are given. Sum (red) shows the cumulative fit of the 4 learned Gaussians.
- E. A simple bet hedging model with heritable proportions of cautious and reckless cells produces observed variation in survival. Bet hedging strategy  $P$  was defined as the probability of cautious cells for  $0 \leq P \leq 1$ . Relative fitness was measured for all strategies after 10 generations in each environment. All nine possible 2-state environmental shifts

between three general osmotic stress environments were considered: permissive (E0; all cells grow equally well), restrictive (E1; reckless cells divide, cautious cells survive without dividing), and killing (E2; reckless cells die, cautious cells survive without cell division). Bet hedging and intermediate strategies ( $0 < P < 1$ ) were most fit only when the environment shifted from moderate to more severe (E1  $\rightarrow$  E2). When E1 was the first environment, the optimum strategy  $P$  depended on generation number.

# Tables

**Table 1. Strains and aliases used in this study.** See Table S1 for details about each of the 49 wild haploid strain derivatives (WHXXX). For brevity, figures are labeled with the wild parent strain number (WXXX; see Table S1 for details).

| Strain        | Genotype                                                                                                                         | Source                                                                                                                                                                                                                                                             |
|---------------|----------------------------------------------------------------------------------------------------------------------------------|--------------------------------------------------------------------------------------------------------------------------------------------------------------------------------------------------------------------------------------------------------------------|
| WHXXX         | <i>MATa ura3Δ0 hoΔ::barcode::KanMX4</i>                                                                                          | Haploid <i>MATa</i> isolates of wild strains. This study; see Table S1 for details.                                                                                                                                                                                |
| BY41          | <i>MATa his3D1 leu2Δ0 met15Δ0 ura3Δ0 flo8-1 hoΔ::barcode::KanMX4</i>                                                             | Barcoded, <i>MATa</i> derivative of BY4742 used as a control genotype for the laboratory strain background. This study.                                                                                                                                            |
| BY4742 (BY01) | <i>MATalpha his3D1 leu2Δ0 lys2Δ0 ura3Δ0 flo8-1</i>                                                                               | <i>MATalpha</i> laboratory strain. BY4741 and BY4742 backgrounds derive from a wild diploid isolated in Merced, California in 1938 on figs (EM93(30); S228C(31)). They are distinguished primarily by the many generations it has been under laboratory selection. |
| G01           | <i>MATalpha his3D1 leu2Δ0 lys2Δ0 ura3Δ0 flo8-1 gpd1D::GFP::URA3</i>                                                              | Used for monitoring GPD1. BY4742 background; this study.                                                                                                                                                                                                           |
| WXXX.BY16     | <i>MATa/MATalpha LYS2/lys2Δ0 ura3Δ0/URA3 FLO8/flo8-1 hoΔ::barcode::KanMX4/ho</i>                                                 | Controls. A set of 49 wild/lab plus 1 BY41.BY16 control for effect of marker gene deletions. This study; see Table S1 for details.                                                                                                                                 |
| WXXX.G01      | <i>MATa/MATalpha HIS3/his3D1 LEU2/leu2Δ0 LYS2/lys2Δ0 ura3Δ0/ura3Δ0 FLO8/flo8-1 hoΔ::barcode::KanMX4/ho GPD1/gpd1D::GFP::URA3</i> | Synthetic population of wild/lab diploids for GPD1 quantification. This study; see Table S1 for details.                                                                                                                                                           |

**Table 2. Negative feedback between rates of change in mean *GPD1::GFP* accumulation and viability among strains.** Correlations confirm causality between rates of change in *GPD1::GFP* accumulation and viability within (upper 3 rows) and between 2 hour time intervals (below). Changes occurring in earlier intervals are listed first. To control for potential deviations from normality, both parametric (Pearson's) and non-parametric (Spearman's) pairwise correlations are shown. As in Figure 1 all 50 strains were tested at 0, 2, and 4 hours and 18 strains were tested at 6 hours (mean values represent a minimum of 3 replicates per strain). Significant comparisons are in bold (JMP statistical software, SAS Institute; Cary, NC).

| N  | Variable           | Interval (hrs) | Variable           | Interval (hrs) | Pearson's r | Spearman's r | Prob> r          |                 |
|----|--------------------|----------------|--------------------|----------------|-------------|--------------|------------------|-----------------|
|    |                    |                |                    |                |             |              | Pearson's        | Spearman's      |
| 50 | $\Delta$ GPD1::GFP | 0 – 2          | $\Delta$ viability | 0 – 2          | 0.8235      | 0.7725       | <b>&lt;.0001</b> | <b>&lt;.000</b> |
| 50 | $\Delta$ GPD1::GFP | 2 – 4          | $\Delta$ viability | 2 – 4          | 0.7739      | 0.7217       | <b>&lt;.0001</b> | <b>&lt;.000</b> |
| 18 | $\Delta$ GPD1::GFP | 4 – 6          | $\Delta$ viability | 4 – 6          | -0.2354     | -0.1992      | 0.3470           | 0.428           |
| 50 | $\Delta$ viability | 0 – 2          | $\Delta$ GPD1::GFP | 2 – 4          | -0.7867     | -0.7411      | <b>&lt;.0001</b> | <b>&lt;.000</b> |
| 50 | $\Delta$ viability | 0 – 2          | $\Delta$ viability | 2 – 4          | -0.9670     | -0.9503      | <b>&lt;.0001</b> | <b>&lt;.000</b> |
| 50 | $\Delta$ GPD1::GFP | 0 – 2          | $\Delta$ GPD1::GFP | 2 – 4          | -0.7685     | -0.7697      | <b>&lt;.0001</b> | <b>&lt;.000</b> |
| 50 | $\Delta$ GPD1::GFP | 0 – 2          | $\Delta$ viability | 2 – 4          | -0.8082     | -0.7696      | <b>&lt;.0001</b> | <b>&lt;.000</b> |
| 18 | $\Delta$ viability | 0 – 2          | $\Delta$ viability | 4 – 6          | -0.1407     | -0.2178      | 0.5777           | 0.385           |
| 18 | $\Delta$ viability | 0 – 2          | $\Delta$ GPD1::GFP | 4 – 6          | -0.3704     | -0.2549      | 0.1303           | 0.307           |
| 18 | $\Delta$ GPD1::GFP | 0 – 2          | $\Delta$ viability | 4 – 6          | -0.0456     | -0.0464      | 0.8573           | 0.854           |
| 18 | $\Delta$ GPD1::GFP | 0 – 2          | $\Delta$ GPD1::GFP | 4 – 6          | -0.4319     | -0.4572      | 0.0735           | 0.056           |
| 18 | $\Delta$ viability | 2 – 4          | $\Delta$ viability | 4 – 6          | -0.0100     | 0.0733       | 0.9685           | 0.772           |
| 18 | $\Delta$ viability | 2 – 4          | $\Delta$ GPD1::GFP | 4 – 6          | 0.4316      | 0.3333       | 0.0737           | 0.176           |
| 18 | $\Delta$ GPD1::GFP | 2 – 4          | $\Delta$ viability | 4 – 6          | 0.1400      | 0.1207       | 0.5796           | 0.633           |
| 18 | $\Delta$ GPD1::GFP | 2 – 4          | $\Delta$ GPD1::GFP | 4 – 6          | 0.3731      | 0.3602       | 0.1273           | 0.142           |

**Table 3. Growth of post-diauxic cells at unprecedented limits of adaptation.** Shown are concentrations of agar media on which post-diauxic strains could grow and form colonies.

| [KCl] M | Wild/lab ( <i>GPD1</i> ) diploids*                                                                               |
|---------|------------------------------------------------------------------------------------------------------------------|
| 2.0     | W455                                                                                                             |
| 2.6     | W027, W035, W167, W202, W203, W242, W285, W454                                                                   |
| 2.7     | W033, W041, W042, W134, W136, W150, W166, W178, W195, W215, W217, W219, W235, W248, W282, W291, W292, W294, BY41 |
| 2.8     | W037, W044, W050, W153, W157, W163, W164, W179, W189, W206, W238, W244, W245, W249, W255, W276, W301, W340       |
| 2.9     | W173, W211, W343                                                                                                 |

**Table 4. Osmotic stress signaling behavior (rank) predicted early and late viability of post-diauxic cultures in osmotic stress.** Least squares predictions of early and late viability by linear and 2<sup>nd</sup> order quadratic fits of fluorescence pre-accumulated into the G3 Gaussian at time 0 (G3\_0) and ranked signaling behavior of 50 strains. The Bonferroni cutoff at the 0.05 level, based on 4 tests per data set, was 0.0125 (JMP statistical software, SAS Institute; Cary, NC). Significant fits with lowest root mean squared errors and highest fraction of variation explained ( $R^2$ ) shown in bold, predicted values for optimum (x) and value at optimum (y) for non-significant fits are shown for comparison.

|                              | G <sub>3</sub> fluorescence (AU)<br>at time 0 |          | Signaling (rank) |         |
|------------------------------|-----------------------------------------------|----------|------------------|---------|
|                              | quadratic                                     | linear   | quadratic        | linear  |
| <b>0 hours, 0M KCl</b>       |                                               |          |                  |         |
| probability > F              | <b>0.0006</b>                                 | 0.0016   | 0.9629           | 0.8454  |
| R_square                     | <b>0.2715</b>                                 | 0.1891   | 0.0016           | 0.0008  |
| root_mean_square_error       | <b>1.3935</b>                                 | 1.4548   | 1.6313           | 1.6149  |
| max_viability at optimum (%) | <b>98.8</b>                                   |          | NS 98.2          |         |
| optimum AU or rank           | <b>2626.6</b>                                 |          | NS 31.9          |         |
| <b>20 hours, 2.5M KCl</b>    |                                               |          |                  |         |
| probability > F              | <b>&lt; 0.0001</b>                            | < 0.0001 | <b>0.0055</b>    | 0.6023  |
| R_square                     | <b>0.4286</b>                                 | 0.3138   | <b>0.1987</b>    | 0.0057  |
| root_mean_square_error       | <b>7.0949</b>                                 | 7.6940   | <b>8.4022</b>    | 9.2615  |
| max_viability at optimum (%) | <b>86.7</b>                                   |          | <b>86.3</b>      |         |
| optimum AU or rank           | <b>2662.5</b>                                 |          | <b>24.4</b>      |         |
| <b>48 hours, 2.5M KCl</b>    |                                               |          |                  |         |
| probability > F              | <b>&lt; 0.0001</b>                            | 0.0003   | <b>0.0013</b>    | 0.9159  |
| R_square                     | <b>0.3148</b>                                 | 0.2371   | <b>0.2464</b>    | 0.0002  |
| root_mean_square_error       | <b>7.6281</b>                                 | 8.1323   | <b>8.1679</b>    | 9.3096  |
| max_viability at optimum (%) | <b>82.2</b>                                   |          | <b>82.9</b>      |         |
| optimum AU or rank           | <b>2622.3</b>                                 |          | <b>25.7</b>      |         |
| <b>72 hours, 2.5M KCl</b>    |                                               |          |                  |         |
| probability > F              | <b>0.0010</b>                                 | 0.0033   | <b>0.0062</b>    | 0.8464  |
| R_square                     | <b>0.2556</b>                                 | 0.1660   | <b>0.1943</b>    | 0.0008  |
| root_mean_square_error       | <b>9.9877</b>                                 | 10.4608  | <b>10.3903</b>   | 11.4501 |
| max_viability at optimum (%) | <b>73.5</b>                                   |          | <b>74.3</b>      |         |
| optimum AU or rank           | <b>2586.8</b>                                 |          | <b>25.1</b>      |         |
| <b>96 hours, 2.5M KCl</b>    |                                               |          |                  |         |
| probability > F              | <b>0.0060</b>                                 | 0.0018   | <b>0.0065</b>    | 0.0954  |
| R_square                     | <b>0.1956</b>                                 | 0.1862   | <b>0.1927</b>    | 0.0569  |
| root_mean_square_error       | <b>8.4186</b>                                 | 8.3789   | <b>8.4338</b>    | 9.0201  |
| max_viability at optimum (%) | <b>71.7</b>                                   |          | <b>71.0</b>      |         |
| optimum AU or rank           | <b>3389.8</b>                                 |          | <b>21.3</b>      |         |

### 120 hours, 2.5M KCI

|                              |         |        |               |        |
|------------------------------|---------|--------|---------------|--------|
| probability > F              | 0.0791  | 0.0413 | <b>0.0004</b> | 0.0037 |
| R_square                     | 0.1023  | 0.0839 | <b>0.2859</b> | 0.1625 |
| root_mean_square_error       | 8.5666  | 8.5636 | <b>7.6405</b> | 8.1881 |
| max_viability at optimum (%) | NS 67.7 |        | <b>74.7</b>   |        |
| optimum AU or rank           | NS 1679 |        | <b>18.1</b>   |        |

### 144 hours, 2.5M KCI

|                              |           |        |               |        |
|------------------------------|-----------|--------|---------------|--------|
| probability > F              | 0.3473    | 0.1675 | <b>0.0047</b> | 0.0501 |
| R_square                     | 0.0440    | 0.0393 | <b>0.2038</b> | 0.0776 |
| root_mean_square_error       | 9.6837    | 9.6059 | <b>8.8377</b> | 9.4123 |
| max_viability at optimum (%) | NS 61.9   |        | <b>68.3</b>   |        |
| optimum AU or rank           | NS 1481.3 |        | <b>20.4</b>   |        |

### 168 hours, 2.5M KCI

|                              |         |         |                   |          |
|------------------------------|---------|---------|-------------------|----------|
| probability > F              | 0.1785  | 0.3433  | <b>&lt;0.0001</b> | < 0.0001 |
| R_square                     | 0.0707  | 0.0187  | <b>0.5733</b>     | 0.4911   |
| root_mean_square_error       | 12.3795 | 12.5879 | <b>8.3885</b>     | 9.0652   |
| max_viability at optimum (%) | NS 56.2 |         | <b>68.4</b>       |          |
| optimum AU or rank           | NS 2077 |         | <b>9.7</b>        |          |

### 24 hours, 3M KCI

|                              |         |         |                    |          |
|------------------------------|---------|---------|--------------------|----------|
| probability > F              | 0.0107  | 0.0292  | <b>&lt; 0.0001</b> | < 0.0001 |
| R_square                     | 0.1757  | 0.0952  | <b>0.5254</b>      | 0.2980   |
| root_mean_square_error       | 11.8963 | 12.3332 | <b>9.0267</b>      | 10.8635  |
| max_viability at optimum (%) | 71.7    |         | <b>65.0</b>        |          |
| optimum AU or rank           | 2029.2  |         | <b>18.1</b>        |          |

### 48 hours, 3M KCI

|                              |           |         |                    |         |
|------------------------------|-----------|---------|--------------------|---------|
| probability > F              | 0.0294    | 0.0140  | <b>&lt; 0.0001</b> | 0.0003  |
| R_square                     | 0.1394    | 0.1193  | <b>0.5382</b>      | 0.2402  |
| root_mean_square_error       | 12.8903   | 12.9029 | <b>9.4420</b>      | 11.9849 |
| max_viability at optimum (%) | NS 57.1   |         | <b>62.3</b>        |         |
| optimum AU or rank           | NS 2867.3 |         | <b>19.7</b>        |         |

### 72 hours, 3M KCI

|                              |         |         |                    |         |
|------------------------------|---------|---------|--------------------|---------|
| probability > F              | 0.0519  | 0.0395  | <b>&lt; 0.0001</b> | 0.0002  |
| R_square                     | 0.1183  | 0.0853  | <b>0.5459</b>      | 0.2460  |
| root_mean_square_error       | 12.4241 | 12.5218 | <b>8.9158</b>      | 11.3687 |
| max_viability at optimum (%) | NS 51.4 |         | <b>56.9</b>        |         |
| optimum AU or rank           | NS 2651 |         | <b>19.7</b>        |         |

### Adaptation limit

|                               |          |        |               |        |
|-------------------------------|----------|--------|---------------|--------|
| probability > F               | 0.5435   | 0.2699 | <b>0.0002</b> | 0.0086 |
| R_square                      | 0.0262   | 0.0258 | <b>0.3099</b> | 0.1379 |
| root_mean_square_error        | 0.1344   | 0.1330 | <b>0.1132</b> | 0.1251 |
| max_concentration optimum (M) | NS 2.8   |        | <b>2.8</b>    |        |
| optimum AU or rank            | NS -95.6 |        | <b>31.2</b>   |        |

## Supplemental Information

### Supplemental Figure Legends

#### **Figure S1. Monophasic *GPD1::GFP* accumulation in exponential cultures.**

Representative samples of exponential cultures exposed to 0.75 M KCl for the times shown. Learned frequency distributions of *GPD1::GFP* accumulation (AU) with mean ( $\bar{x}$ ), standard deviation (std), and weight ( $w$ ; the fraction of cells in each distribution) are given (zero-weighted distributions not shown). Sum (red) shows the cumulative fit of the 4 learned Gaussians. The 18 representative strains are color-coded as in Figure 1B. Data for all strains were normalized for comparison.

#### **Figure S2. Static viability and survival in extreme osmotic stress.**

Post-diauxic cultures were incubated for up to 5 weeks in 3 M KCl before plating on iso-osmolar media. This experiment, intended as a purely qualitative assessment of viability after long exposures to 3.0 M KCl extreme osmotic stress, was repeated once. A plate key is given in Table S3; the same data sorted by rank are shown in Figure 2B.

#### **Figure S3a-c. Multiphasic distributions of *GPD1::GFP* accumulation in post diauxic cultures.**

Representative replicates of post-diauxic cultures exposed to 2.5 M KCl for the times shown. Learned distributions of *GPD1::GFP* accumulation (AU) with mean ( $\bar{x}$ ), standard deviation (std), and weight ( $w$ ; the fraction of cells in each distribution) are given (zero-weighted distributions not shown). Sum (red) shows the cumulative fit of the 4 learned Gaussians. The 18 representative strains are color-coded as in Figure 1B.

#### **Figure S4. Rank predicts osmotic stress signaling behavior.**

The average percent of cells in each strain above a threshold set at the top 11% of accumulation of *GPD1::GFP* normalized across all post-diauxic cultures. Strains were exposed to 2.5 M KCl for increasing times shown and ordered according to rank. The number of strains in each mean clusters is indicated with increasingly lighter grey scale in their order of “recklessness” signaling: 2 strains (MC0), 15 (MC1), 12 (MC3), 12 (MC2), 6 (MC5), 3 (MC4). The 18 representative strains are color-coded as in Figure 1B.



## Movie Legends

**Movie 1.** Exponential W027 cells seeded with a single post diauxic cell of the same genotype (box). Media was switched to 1.5M KCl at time 0, GPD1::GFP fluorescence is shown in green. Time stamp shown in upper right.

**Movie 2.** Post-diauxic W027 cells exposed to 1.5 M KCl, GPD1::GFP fluorescence is shown in green. Time stamp shown in upper right.

**Movie 3.** Post-diauxic W027 cells exposed to 2.5 M KCl, GPD1::GFP fluorescence is shown in green. Time stamp shown in upper right.

**Table S1. Haploid derivatives of wild strains.**

The source for all wild strains in this study was the strain collection of the Royal Netherlands Academy of Arts and Sciences over the past 100 years (Table 1 and Table S1). This resource has been deposited at the Yeast Genetic Resources Lab of the National BioResource Project in Osaka, Japan.

| Alias | MAT | Genotype                                   | Comments                                                                                                                                                                                                                       |
|-------|-----|--------------------------------------------|--------------------------------------------------------------------------------------------------------------------------------------------------------------------------------------------------------------------------------|
| WH027 | a   | <i>MATa</i> ura3Δ0<br>hoΔ::barcode::KanMX4 | Original CBS #: CBS 459; isolated in 1938 in Castellina, Italy from grape must; barcode #29(Uptag sequence: GGCCCGCACACAATTAGGAA, Downtag sequence: GCGCCGCATTAACTAACTA)                                                       |
| WH030 | a   | <i>MATa</i> ura3Δ0<br>hoΔ::barcode::KanMX4 | Original CBS #: CBS 1508; isolated in 1927 from starter for sorghum brandy; YH note: mating defective, hard to make wild/lab diploids; barcode #16(Uptag sequence: GTCCGAACATCAACACGTA, Downtag sequence: GCGCAGAGAAACCTCTTAA) |
| WH033 | a   | <i>MATa</i> ura3Δ0<br>hoΔ::barcode::KanMX4 | Original CBS #: CBS 405; isolated in 1925 in West Africa from catabo for billi wine, from <i>Osbeckia grandiflora</i> ; barcode #187(Uptag sequence: CCGTGTACTGAATTACGATC, Downtag sequence: CCATCTTTGGTAATGTGAGG)             |
| WH035 | a   | <i>MATa</i> ura3Δ0<br>hoΔ::barcode::KanMX4 | Original CBS #: CBS 5822; isolated in 1967 from malt wine; barcode #30(Uptag sequence: GGTCTATGCAAACACCCGAA, Downtag sequence: GCCGTCTTGACAACCTTATA)                                                                           |
| WH037 | a   | <i>MATa</i> ura3Δ0<br>hoΔ::barcode::KanMX4 | Original CBS #: CBS 1395; isolated in 1922 from an unknown source; barcode #235(Uptag sequence: GGCTAAGGGACAACACCTCA, Downtag sequence: GCGCCGACATAGAAGTAAC)                                                                   |
| WH041 | a   | <i>MATa</i> ura3Δ0<br>hoΔ::barcode::KanMX4 | Original CBS #: CBS 5635; isolated in 1958 in South Africa from grape must; barcode #2(Uptag sequence: CCATGATGTAAACGATCCGA, Downtag sequence: TATATGGCAGCAGATCGCCG)                                                           |
| WH042 | a   | <i>MATa</i> ura3Δ0<br>hoΔ::barcode::KanMX4 | Original CBS #: CBS 3081; isolated in 1958 in Spain from alpechin; barcode #12(Uptag sequence: GTGCGAACCAACGTACTACA, Downtag sequence: GCAGGAACACCACAGGGTTA)                                                                   |
| WH044 | a   | <i>MATa</i> ura3Δ0<br>hoΔ::barcode::KanMX4 | Original CBS #: CBS 422; isolated in 1926 in Odessa, Ukraine from beer; barcode #135(Uptag sequence: CCCGCGATTGTAATGAATAG, Downtag sequence: CATACTACGTGGGACAGTTG)                                                             |
| WH050 | a   | <i>MATa</i> ura3Δ0<br>hoΔ::barcode::KanMX4 | Original CBS #: CBS 5112; isolated in 1962 in Spain from grape must; barcode #49(Uptag sequence: CTTACTGATAGCGTAGAGGT, Downtag sequence: GTGGTCTGCAAACCCAACAA)                                                                 |

|       |          |                                            |                                                                                                                                                                                          |
|-------|----------|--------------------------------------------|------------------------------------------------------------------------------------------------------------------------------------------------------------------------------------------|
| WH134 | <b>a</b> | <i>MATa</i> ura3Δ0<br>hoΔ::barcode::KanMX4 | Original CBS #: CBS 2964; isolated in 1947 in Copenhagen, Denmark from distiller's rum yeast; barcode #18(Uptag sequence: GCCCTGATAACAAGGTGTAA, Downtag sequence: GCGCCTATTACACAAACGTA)  |
| WH136 | <b>a</b> | <i>MATa</i> ura3Δ0<br>hoΔ::barcode::KanMX4 | Original CBS #: CBS 2811; isolated in 1957 from wine; wine yeast; barcode #20(Uptag sequence: GTGAGCGAAACACCGCGTAA, Downtag sequence: GGTAATACGCAACTCCTCTA)                              |
| WH150 | <b>a</b> | <i>MATa</i> ura3Δ0<br>hoΔ::barcode::KanMX4 | Original CBS #: CBS 2962; isolated in 1947 in Copenhagen, Denmark from distiller's rum; barcode #15(Uptag sequence: GCCGTAGCCACAAGAGTTAA, Downtag sequence: GCGGCCACTTACACAAATTA)        |
| WH153 | <b>a</b> | <i>MATa</i> ura3Δ0<br>hoΔ::barcode::KanMX4 | Original CBS #: CBS 6458; isolated in 1972; barcode #37(Uptag sequence: GGGACCGCCAAAGCTATCAA, Downtag sequence: GTGAACAATAACGGCCTTGA)                                                    |
| WH157 | <b>a</b> | <i>MATa</i> ura3Δ0<br>hoΔ::barcode::KanMX4 | Original CBS #: CBS 6506; isolated in 1973 in UK brewery; killer yeast; barcode #53(Uptag sequence: CTGAGCGTAGGATATTCCGT, Downtag sequence: GCCGGTCGCAAACTCATAAA)                        |
| WH163 | <b>a</b> | <i>MATa</i> ura3Δ0<br>hoΔ::barcode::KanMX4 | Original CBS #: CBS 6914; isolated in 1977 in Spain from white wine; barcode #51(Uptag sequence: CTACGTCGGCTCATAGTCGT, Downtag sequence: GCTCTCGGCCAAGGAAACAA)                           |
| WH164 | <b>a</b> | <i>MATa</i> ura3Δ0<br>hoΔ::barcode::KanMX4 | Original CBS #: CBS 6978; isolated in 1984 from wine; wine yeast; barcode #59(Uptag sequence: CACTCGGATTGAGTTCTAGT, Downtag sequence: GGCCTTGCCAAACAGTCAAA)                              |
| WH166 | <b>a</b> | <i>MATa</i> ura3Δ0<br>hoΔ::barcode::KanMX4 | Original CBS #: CBS 7072; isolated in 1980 from distillate; barcode #62(Uptag sequence: CCTAGTTCGAGATTGCGAGT, Downtag sequence: GTGGTCGCCCAAGCAACAAA)                                    |
| WH167 | <b>a</b> | <i>MATa</i> ura3Δ0<br>hoΔ::barcode::KanMX4 | Original CBS #: CBS 7173; isolated in 1985 from catabo for billi wine; wine yeast; barcode #43(Uptag sequence: CAGTATGCTAGATTCCGGGT, Downtag sequence: GTCCTCGCAAGAAAGGCCAA)             |
| WH173 | <b>a</b> | <i>MATa</i> ura3Δ0<br>hoΔ::barcode::KanMX4 | Original CBS #: CBS 8615; isolated in 1998 in Italy from grape must; dry yeast for wine making; barcode #61(Uptag sequence: CCTGTAGTACGAGTATGAGT, Downtag sequence: GGTCTGCCCAAGTCACAAA) |
| WH178 | <b>a</b> | <i>MATa</i> ura3Δ0<br>hoΔ::barcode::KanMX4 | Original CBS #: CBS 1192; isolated in 1928 from wine; wine yeast; barcode #155(Uptag sequence: CGCACACGATTAAGGTCCAG, Downtag sequence: CACTGTTGGTAAGGTCTATG)                             |
| WH179 | <b>a</b> | <i>MATa</i> ura3Δ0<br>hoΔ::barcode::KanMX4 | Original CBS #: CBS 1193; isolated in 1928 from wine; wine yeast; barcode #70(Uptag sequence: CAATAGGGTGTGACAGTTCT, Downtag sequence: CTACTTCGCGTGAGCTGGTT)                              |

|       |          |                                            |                                                                                                                                                                                                                            |
|-------|----------|--------------------------------------------|----------------------------------------------------------------------------------------------------------------------------------------------------------------------------------------------------------------------------|
| WH189 | <b>a</b> | <i>MATa</i> ura3Δ0<br>hoΔ::barcode::KanMX4 | Original CBS #: CBS 1241; isolated in 1930 from an unknown source ; barcode #212(Uptag sequence: CCACTTAGTTCAATAGGCGC, Downtag sequence: CCGAGTATTACATTCTCACG)                                                             |
| WH195 | <b>a</b> | <i>MATa</i> ura3Δ0<br>hoΔ::barcode::KanMX4 | Original CBS #: CBS 1256; isolated in 1937 from port wine; barcode #123(Uptag sequence: CGTGGAGCAGTTCGTATAAT, Downtag sequence: CTCGACGCTGGACGTTATGT)                                                                      |
| WH202 | <b>a</b> | <i>MATa</i> ura3Δ0<br>hoΔ::barcode::KanMX4 | Original CBS #: CBS 7372; isolated in 1988; killer yeast, K2Rd (Young & Yagi), K2R2 (Wickner); barcode #119(Uptag sequence: CAACGTAGAGTGAGGTACAT, Downtag sequence: CACTTAGCTTAGACTCGTGT)                                  |
| WH203 | <b>a</b> | <i>MATa</i> ura3Δ0<br>hoΔ::barcode::KanMX4 | Original CBS #: CBS 7438; isolated in 1989 from wine; wine yeast; barcode #65(Uptag sequence: CTTTCGGACGTATGTGCAGT, Downtag sequence: CCTTGATGATAGAGGGCTTT)                                                                |
| WH206 | <b>a</b> | <i>MATa</i> ura3Δ0<br>hoΔ::barcode::KanMX4 | Original CBS #: CBS 7833; isolated in 1994 in Missouri, USA from lung of a man with immune deficiency syndrome; virulent strain; barcode #82(Uptag sequence: CATACAAAGAGAGGTGTCCT, Downtag sequence: CCCTTGCGATTGGTGCAGTT) |
| WH211 | <b>a</b> | <i>MATa</i> ura3Δ0<br>hoΔ::barcode::KanMX4 | Original CBS #: CBS 7838; isolated in 1994 in USA from patient; barcode #144(Uptag sequence: CGATACAAGTAAGTTGCGAG, Downtag sequence: CCTCTTACGAGATAGCGGTG)                                                                 |
| WH215 | <b>a</b> | <i>MATa</i> ura3Δ0<br>hoΔ::barcode::KanMX4 | Original CBS #: CBS 7962; isolated in 1984 in Sao Paulo, Brazil from fermenting concentrated syrup from sugar cane; barcode #94(Uptag sequence: CCCGATTGAGGCATGGTTAT, Downtag sequence: CGCTTCGAGTATGGGATATT)              |
| WH217 | <b>a</b> | <i>MATa</i> ura3Δ0<br>hoΔ::barcode::KanMX4 | Original CBS #: CBS 7964; isolated in 1995 in Sao Paulo, Brazil from fermenting concentrated syrup from sugar cane; barcode #92(Uptag sequence: CGCGGAGTATAGAGCTTTAT, Downtag sequence: CAATCGCTCGGAGGCGTATT)              |
| WH219 | <b>a</b> | <i>MATa</i> ura3Δ0<br>hoΔ::barcode::KanMX4 | Original CBS #: CBS 439 ; isolated in 1933 in Lager Schartel, Germany from Silvaner grapes; barcode #93(Uptag sequence: CGACCCTGATGATCCTTTAT, Downtag sequence: CTACGGGCTCGATGCCTATT)                                      |
| WH235 | <b>a</b> | <i>MATa</i> ura3Δ0<br>hoΔ::barcode::KanMX4 | Original CBS #: CBS 5952; isolated in 1968; barcode #102(Uptag sequence: GGCTACGATACATCTTCATC, Downtag sequence: CATTTGTAACCAGTTTCGCTC)                                                                                    |
| WH238 | <b>a</b> | <i>MATa</i> ura3Δ0<br>hoΔ::barcode::KanMX4 | Original CBS #: CBS 6223; isolated in 1969 in Chile from grape juice; radiation resistant; barcode #104(Uptag sequence: CTATGTGCGGTAAGACGTAT, Downtag sequence: CGGCGTAGATTGTTAGCATT)                                      |

|       |          |                                            |                                                                                                                                                                                                                                                                                                             |
|-------|----------|--------------------------------------------|-------------------------------------------------------------------------------------------------------------------------------------------------------------------------------------------------------------------------------------------------------------------------------------------------------------|
| WH242 | <b>a</b> | <i>MATa</i> ura3Δ0<br>hoΔ::barcode::KanMX4 | Original CBS #: CBS 6333; isolated in 1942 in Costa Rica from rotting banana; Strain name NRRL Y-1350 (synonymous designation; NRRL YB-210, NRRL-210, NRRL-B210; Mortimer and Johnston (1986), Genetics 113: 35); barcode #56(Uptag sequence: CCTGTAGATTGACGTGTAGT, Downtag sequence: GCCCTCGTGACAAATCGAAA) |
| WH244 | <b>a</b> | <i>MATa</i> ura3Δ0<br>hoΔ::barcode::KanMX4 | Original CBS #: CBS 8266; isolated in 1996 from rotting fig; Strain name X2180, derived from S288C by self-diploidization (Mortimer and Johnston (1986), Genetics 113: 35). Did not survive freeze-drying.; barcode #122(Uptag sequence: CAGAGGGCACTGTTCTTAAT, Downtag sequence: CCCTGCTGTAGAGGTTATGT)      |
| WH245 | <b>a</b> | <i>MATa</i> ura3Δ0<br>hoΔ::barcode::KanMX4 | Original CBS #: CBS 3000; isolated in 1956 in Pakistan from palm wine; wine yeast; barcode #138(Uptag sequence: CACATCGTTTAACACTGGAG, Downtag sequence: CTAGGAGGTTACAGTCATTG)                                                                                                                               |
| WH248 | <b>a</b> | <i>MATa</i> ura3Δ0<br>hoΔ::barcode::KanMX4 | Original CBS #: CBS 8049; isolated in 1981 from fish food; feed for fish and crustaceans; barcode #108(Uptag sequence: CGACCCGATGTAGTAGATAT, Downtag sequence: CCGCCGGATGTGATATAATT)                                                                                                                        |
| WH249 | <b>a</b> | <i>MATa</i> ura3Δ0<br>hoΔ::barcode::KanMX4 | Original CBS #: CBS 6069; isolated in 1981; hybrid strain (Y55-2 x JJ101); barcode #87(Uptag sequence: CACTGTGACCGAGGGATACT, Downtag sequence: CGCGCTATTATACTCGACTT)                                                                                                                                        |
| WH255 | <b>a</b> | <i>MATa</i> ura3Δ0<br>hoΔ::barcode::KanMX4 | Original CBS #: CBS 3090; isolated in 1958 from white grape must; barcode #72(Uptag sequence: CACTGTGGACGATACGGTCT, Downtag sequence: CTGTACGTGCGATACTCGTT)                                                                                                                                                 |
| WH276 | <b>a</b> | <i>MATa</i> ura3Δ0<br>hoΔ::barcode::KanMX4 | Original CBS #: CBS 1394; isolated in 1924 from pressed yeast; distillery yeast; barcode #176(Uptag sequence: CCACCGATGTAATTTGAGTC, Downtag sequence: CACTCTGCGTTAATGTTGGG)                                                                                                                                 |
| WH282 | <b>a</b> | <i>MATa</i> ura3Δ0<br>hoΔ::barcode::KanMX4 | Original CBS #: CBS 1460; isolated in 1927 in Indonesia from fermenting fruit; barcode #115(Uptag sequence: CATACTAGGGATCAGGGAT, Downtag sequence: CCTTGTCTGAGAGCCGTTGT)                                                                                                                                    |
| WH285 | <b>a</b> | <i>MATa</i> ura3Δ0<br>hoΔ::barcode::KanMX4 | Original CBS #: CBS 1479; isolated in 1928 from wine; wine yeast; barcode #240(Uptag sequence: GCGGCCAATAGTAACTTCA, Downtag sequence: GCCGCCGTGATAAGAAACAC)                                                                                                                                                 |
| WH291 | <b>a</b> | <i>MATa</i> ura3Δ0<br>hoΔ::barcode::KanMX4 | Original CBS #: CBS 1576; isolated in 1931 in Sulawesi, Indonesia from sap of Arenga palm; barcode #117(Uptag sequence: CCTGAGGACTTATTCACGAT, Downtag sequence: CATTGGATTAGACCGTGTGT)                                                                                                                       |
| WH292 | <b>a</b> | <i>MATa</i> ura3Δ0<br>hoΔ::barcode::KanMX4 | Original CBS #: CBS 1582; isolated in 1948 in Portugal from wine; barcode #118(Uptag sequence: CCGATTAGAGGTTGACAGAT, Downtag sequence: CACTGACTTCGAGGTCGTGT)                                                                                                                                                |

|                  |          |                                                                            |                                                                                                                                                                                                                                                                                                                               |
|------------------|----------|----------------------------------------------------------------------------|-------------------------------------------------------------------------------------------------------------------------------------------------------------------------------------------------------------------------------------------------------------------------------------------------------------------------------|
| WH294            | <b>a</b> | <i>MATa</i> ura3Δ0<br>hoΔ::barcode::KanMX4                                 | Original CBS #: CBS 1585; isolated in 1934 from sake-moto; sake yeast; barcode #180(Uptag sequence: CATTAAAGGCGCACGTTTATC, Downtag sequence: CTATCCTAGAGATTTGAGGG)                                                                                                                                                            |
| WH301            | <b>a</b> | <i>MATa</i> ura3Δ0<br>hoΔ::barcode::KanMX4                                 | Original CBS #: CBS 1594; isolated in 1936 from juice of aren palm; barcode #182(Uptag sequence: CACGTTTGCGAATAGGTATC, Downtag sequence: CAGATACTATTAAGTGCCGG)                                                                                                                                                                |
| WH340            | <b>a</b> | <i>MATa</i> ura3Δ0<br>hoΔ::barcode::KanMX4                                 | Original CBS #: CBS 2805; isolated in 1954 from wine; wine yeast, particularly suitable for fruit wines; barcode #233(Uptag sequence: GCCGGGCTTAAATTGAATCA, Downtag sequence: GCTCCGACTGAAGAACTAAC)                                                                                                                           |
| WH343            | <b>a</b> | <i>MATa</i> ura3Δ0<br>hoΔ::barcode::KanMX4                                 | Original CBS #: CBS 2808; isolated in 1954 from grapes (Blauer Portugieser); wine yeast, suitable for fruit wines, yields more than 18% of alcohol; barcode #224(Uptag sequence: CCCGTGAATATAAGTGAAGC, Downtag sequence: CCTGGATTTGAAGCGTATAG)                                                                                |
| WH454            | <b>a</b> | <i>MATa</i> ura3Δ0<br>hoΔ::barcode::KanMX4                                 | Original CBS #: CBS 6412; isolated in 1952 from sake; sake yeast; barcode #192(Uptag sequence: CCTTAGGGATAATGAGTTGC, Downtag sequence: CCAGTGTTCTAACGTGCAGG)                                                                                                                                                                  |
| WH455            | <b>a</b> | <i>MATa</i> ura3Δ0<br>hoΔ::barcode::KanMX4                                 | Original CBS #: CBS 440; isolated in 1934 in Taiwan from molasses; barcode #249(Uptag sequence: GCCCAGGCTAAATGTTAAGA, Downtag sequence: GAAGTACGCTCAAGACCGAC)                                                                                                                                                                 |
| BC4741<br>(BY41) | <b>a</b> | <i>MATa</i> his3D1 leu2Δ0<br>met15Δ0 ura3Δ0 flo8-1<br>hoΔ::barcode::KanMX4 | Original CBS #: Lab strain, BY4741; isolated in 1938 in Merced, CA, USA from rotting fig; derived from S288C, of which strain 88% of the gene pool is contributed by strain EM93 (Mortimer and Johnston (1986), Genetics 113: 35). Barcode #266(Uptag sequence: GGCCTAACTCAACAGACGGA, Downtag sequence: GCGCTCGACTAAGAGAAACC) |

**Table S2. Clustering statistics used to rank signaling behavior.**

Statistics showing the fraction of 17,000 permutations in which strains were clustered with at least 50% of the other strains in each mean cluster. These data were used to rank total signaling behaviors from most cautious (1) to most reckless (50) based on the fraction of time each strain was associated with its mean cluster (characteristic of that cluster). See Figure 2.

| Rank | Cluster | Strain | MC0    | MC1    | MC3    | MC2    | MC5    | MC4    |
|------|---------|--------|--------|--------|--------|--------|--------|--------|
| 1    | MC0     | W455   | 0.8484 | 0.1516 | 0      | 0      | 0      | 0      |
| 2    | MC0     | W167   | 0.8365 | 0.1635 | 0      | 0      | 0      | 0      |
| 3    | MC1     | W219   | 0.6375 | 0.3625 | 0      | 0      | 0      | 0      |
| 4    | MC1     | W217   | 0.5536 | 0.4460 | 0.0004 | 0      | 0      | 0      |
| 5    | MC1     | W027   | 0.5214 | 0.4755 | 0.0028 | 0.0002 | 0      | 0      |
| 6    | MC1     | W042   | 0.4850 | 0.4892 | 0.0191 | 0.0044 | 0.0023 | 0.0001 |
| 7    | MC1     | W235   | 0.1976 | 0.5532 | 0.2266 | 0.0226 | 0      | 0.0002 |
| 8    | MC1     | W340   | 0.1700 | 0.5803 | 0.2354 | 0.0142 | 0      | 0      |
| 9    | MC1     | W454   | 0.3355 | 0.6610 | 0.0034 | 0      | 0      | 0      |
| 10   | MC1     | W134   | 0.1686 | 0.7376 | 0.0821 | 0.0117 | 0      | 0      |
| 11   | MC1     | W276   | 0.1617 | 0.7643 | 0.0658 | 0.0083 | 0      | 0      |
| 12   | MC1     | W294   | 0.1692 | 0.7834 | 0.0440 | 0.0034 | 0      | 0      |
| 13   | MC1     | W157   | 0.1195 | 0.7851 | 0.0866 | 0.0088 | 0      | 0      |
| 14   | MC1     | W202   | 0.1671 | 0.7855 | 0.0446 | 0.0027 | 0      | 0      |
| 15   | MC1     | W238   | 0.1337 | 0.8048 | 0.0580 | 0.0036 | 0      | 0      |
| 16   | MC1     | W035   | 0.1293 | 0.8086 | 0.0572 | 0.0050 | 0      | 0      |
| 17   | MC1     | W248   | 0.1494 | 0.8331 | 0.0172 | 0.0003 | 0      | 0      |
| 18   | MC3     | W130   | 0.0003 | 0.0671 | 0.7020 | 0.2307 | 0      | 0      |
| 19   | MC3     | W136   | 0      | 0.0092 | 0.6572 | 0.3334 | 0.0002 | 0      |
| 20   | MC3     | W203   | 0.0025 | 0.1348 | 0.6410 | 0.2214 | 0.0002 | 0      |
| 21   | MC3     | W285   | 0.0003 | 0.0806 | 0.6245 | 0.2924 | 0.0022 | 0      |
| 22   | MC3     | W163   | 0.0011 | 0.1474 | 0.6228 | 0.2285 | 0.0002 | 0      |
| 23   | MC3     | W206   | 0      | 0.0036 | 0.6203 | 0.3747 | 0.0014 | 0      |
| 24   | MC3     | BY41   | 0      | 0.0123 | 0.6102 | 0.3768 | 0.0008 | 0      |
| 25   | MC3     | W041   | 0.0002 | 0.0233 | 0.5625 | 0.4090 | 0.0050 | 0      |
| 26   | MC3     | W343   | 0.0012 | 0.0432 | 0.5522 | 0.3910 | 0.0123 | 0.0002 |
| 27   | MC3     | W292   | 0.0201 | 0.1962 | 0.4883 | 0.2893 | 0.0062 | 0      |
| 28   | MC3     | W189   | 0.0001 | 0.0205 | 0.4757 | 0.4715 | 0.0319 | 0.0003 |
| 29   | MC3     | W211   | 0      | 0      | 0.3698 | 0.5572 | 0.0696 | 0.0033 |
| 30   | MC2     | W245   | 0      | 0      | 0.2579 | 0.6898 | 0.0523 | 0      |
| 31   | MC2     | W291   | 0      | 0      | 0.2211 | 0.6786 | 0.0994 | 0.0009 |



|    |     |      |        |        |        |        |        |        |
|----|-----|------|--------|--------|--------|--------|--------|--------|
| 32 | MC2 | W164 | 0      | 0      | 0.1517 | 0.6601 | 0.1852 | 0.0031 |
| 33 | MC2 | W249 | 0      | 0      | 0.3349 | 0.6417 | 0.0233 | 0.0001 |
| 34 | MC2 | W166 | 0      | 0      | 0.3372 | 0.6407 | 0.0220 | 0.0001 |
| 35 | MC2 | W179 | 0      | 0.0002 | 0.3569 | 0.6212 | 0.0217 | 0      |
| 36 | MC2 | W244 | 0      | 0      | 0.1478 | 0.6160 | 0.2225 | 0.0137 |
| 37 | MC2 | W173 | 0      | 0.0003 | 0.3801 | 0.6005 | 0.0188 | 0.0002 |
| 38 | MC2 | W215 | 0      | 0.0012 | 0.3162 | 0.6000 | 0.0815 | 0.0011 |
| 39 | MC2 | W037 | 0      | 0      | 0.0714 | 0.5308 | 0.3863 | 0.0115 |
| 40 | MC2 | W255 | 0      | 0.0011 | 0.4771 | 0.5141 | 0.0077 | 0      |
| 41 | MC2 | W050 | 0      | 0      | 0.0567 | 0.4672 | 0.4417 | 0.0343 |
| 42 | MC5 | W044 | 0      | 0      | 0.0021 | 0.0728 | 0.8501 | 0.0750 |
| 43 | MC5 | W195 | 0      | 0      | 0.0019 | 0.0744 | 0.8501 | 0.0736 |
| 44 | MC5 | W301 | 0      | 0      | 0.0029 | 0.0882 | 0.8203 | 0.0887 |
| 45 | MC5 | W150 | 0.0001 | 0.0004 | 0.0006 | 0.0414 | 0.7978 | 0.1598 |
| 46 | MC5 | W033 | 0      | 0      | 0      | 0.0279 | 0.7196 | 0.2525 |
| 47 | MC5 | W153 | 0      | 0      | 0      | 0.0181 | 0.6545 | 0.3274 |
| 48 | MC4 | W282 | 0      | 0      | 0      | 0      | 0.0596 | 0.9404 |
| 49 | MC4 | W242 | 0      | 0      | 0      | 0.0002 | 0.1477 | 0.8521 |
| 50 | MC4 | W178 | 0      | 0      | 0      | 0.0017 | 0.1697 | 0.8286 |

**Table S3. Plate key for Figure S2.**

|   | 1         | 2         | 3         | 4         | 5         | 6         |
|---|-----------|-----------|-----------|-----------|-----------|-----------|
| A | W027.BY01 | W044.BY01 | W153.BY01 | W173.BY01 | W203.BY01 | W235.BY01 |
| B | W033.BY01 | W050.BY01 | W157.BY01 | W178.BY01 | W206.BY01 | W238.BY01 |
| C | W035.BY01 | W130.BY01 | W163.BY01 | W179.BY01 | W211.BY01 | W242.BY01 |
| D | W037.BY01 | W134.BY01 | W164.BY01 | W189.BY01 | W215.BY01 | W244.BY01 |
| E | W041.BY01 | W136.BY01 | W166.BY01 | W195.BY01 | W217.BY01 | W245.BY01 |
| F | W042.BY01 | W150.BY01 | W167.BY01 | W202.BY01 | W219.BY01 | W248.BY01 |
|   | 1         | 2         | 3         |           |           |           |
| A | W249.BY01 | W292.BY01 | W455.BY01 |           |           |           |
| B | W255.BY01 | W294.BY01 |           |           |           |           |
| C | W276.BY01 | W301.BY01 |           |           |           |           |
| D | W282.BY01 | W340.BY01 |           |           |           |           |
| E | W285.BY01 | W343.BY01 |           |           |           |           |
| F | W291.BY01 | W454.BY01 |           |           |           |           |

**Bet hedging model**

Annotated code for our model of bet hedging with heritable probability of binary, cautious versus reckless bet hedging is publicly available (<https://figshare.com/s/2c03544aef0c40cc86c2>). The bet hedging 'strategy'  $P$  was defined as the heritable probability of cautious cells for  $0 \leq P \leq 1$ . Nine possible 2-state environmental shifts between three general osmotic stress environments were considered: permissive (E0; all cells grow equally well), restrictive (E1; reckless cells divide, cautious cells survive without dividing), and killing (E2; reckless cells die, cautious cells survive without cell division). The relative fitness of representative strategies (0, 0.1, 0.2, ...1.0; number of surviving cells in each strategy divided by the total number of surviving cells across all strategies) was calculated after 10 generations in each environment except as shown on Figure 3c. For simplicity, the natural attrition of older cells (death and disappearance) and rates of cell division were assumed to be equal for all strains. Results were independent of the number of generations in the first environment except as shown when E1 was the first environment.

## Databases and linked archives

Flow cytometry database (annotated)

(<https://figshare.com/s/52ef966b16cba7f41d7f/>)

Python script for bet hedging model

(<https://figshare.com/s/2c03544aef0c40cc86c2/>)

Figure S1 complete data set

(<https://figshare.com/s/8b709fd16cccbabc2a5a/>)

Figure S3 complete data set

(<https://figshare.com/s/8147275b62eb8d4db6bf/>)

Excel file with tables and raw data

(<https://figshare.com/s/00a7bf31d2791922f1d8/>)
